# Supplementary material for: The Importance of ATM and ATR in Physcomitrella patens DNA Damage Repair, Development, and Gene Targeting
Source: PubMed Central journal article supplement (PMC7397299; doi:10.3390/genes11070752), 2020-07-06
Supplement: genes-11-00752-s001.pdf [file genes-11-00752-s001.pdf]

## **Supplemental materials**

### **The importance of ATM and ATR in *Physcomitrella patens* DNA damage repair, development, and gene targeting**

Martin Martens, Ralf Horres, Edelgard Wendeler, and Bernd Reiss

## **Supplemental figures**

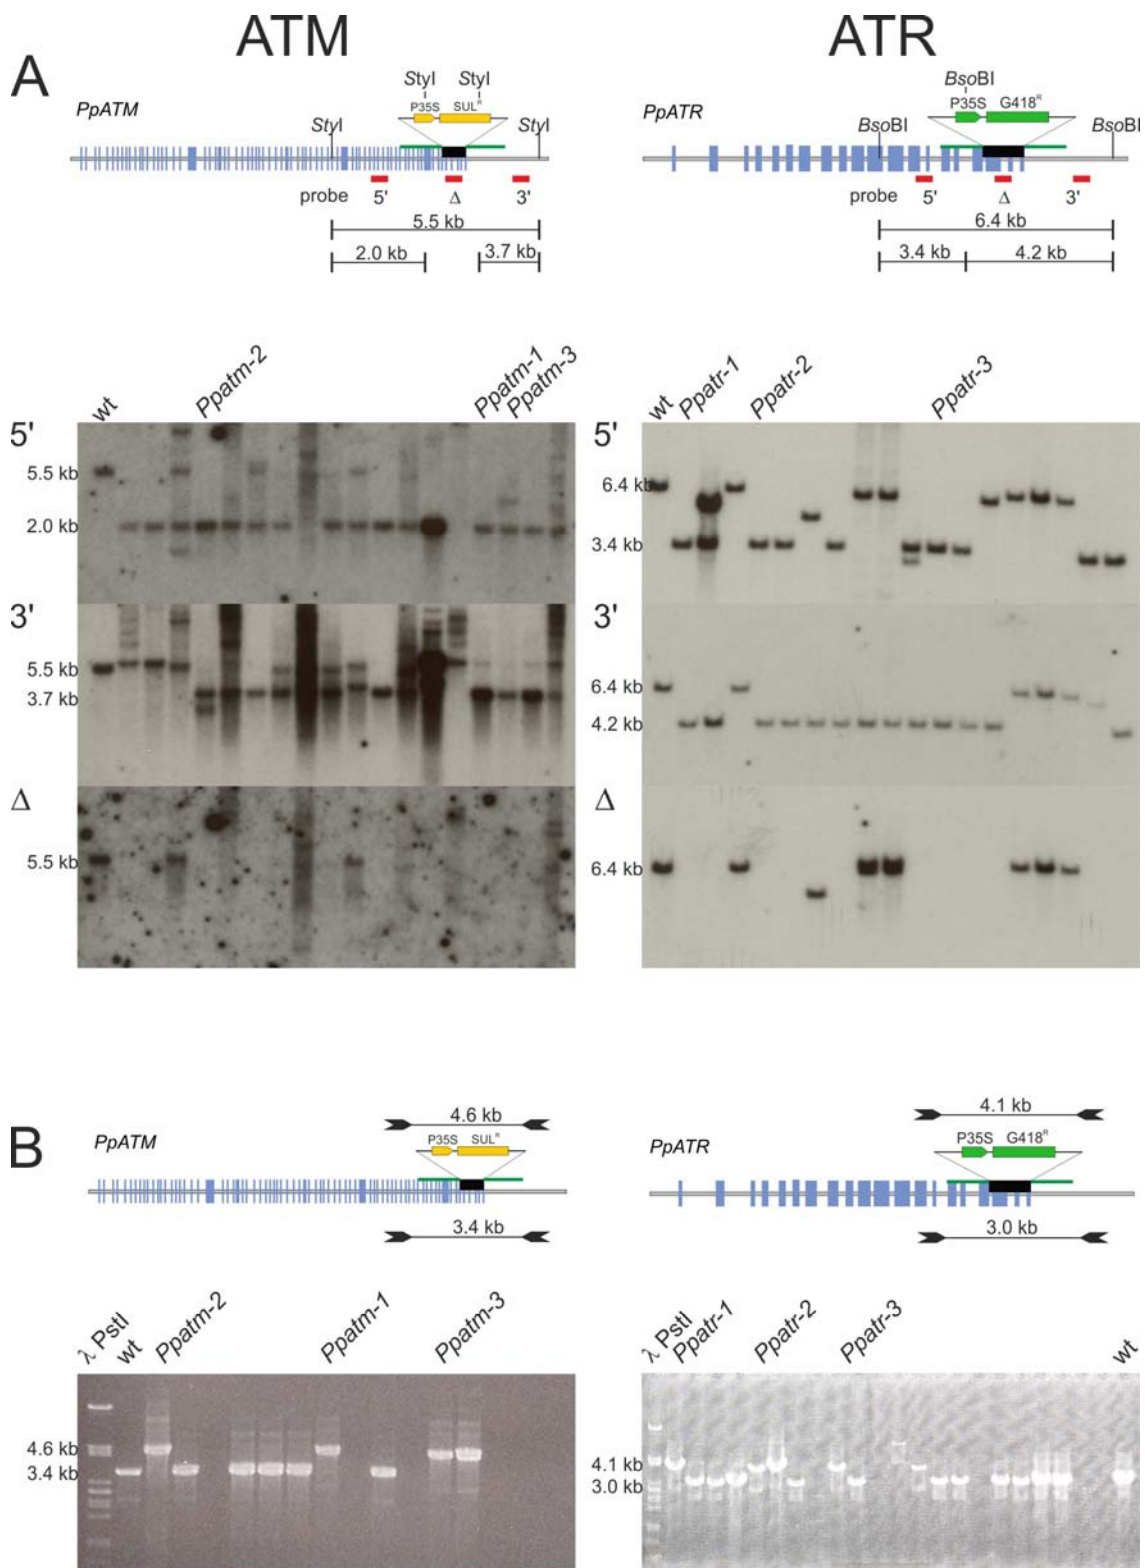

**Figure S1: Molecular analysis of *Ppatm* and *Ppatr* mutants.** (A) Southern blot analysis of mutants. The scheme on top shows show the molecular structure of the *PpATM* and *PpATR* genes

and the gene replacements produced by precise HR, as in figure 1 A. In addition, the regions of homology between vectors and genomic sequences are indicated (green bars). The G418 and SUL resistance marker genes are as in figure 1 A. The positions of restriction enzymes used for the Southern blot analysis are shown. Fragment sizes obtained with unmodified genomic loci and after precise gene replacement are shown below. The results are shown below. Genomic DNA digested with *StyI* and *BsoBI*, respectively, was separated by agarose gel electrophoresis and blotted to a Nylon membrane. This membrane was probed consecutively with the three different probes detecting the 5' and 3' recombination junction fragments and the deleted region ( $\Delta$ ). The blots show that both recombination junctions are correct and the genomic region intended to delete is absent in the selected mutants. **(B)** PCR analysis of mutants. The scheme on top is the same as in A except that positions of primer binding sites and fragment sizes obtained by PCR are indicated. The results are shown below. Genomic DNA was amplified with long template PCR and the primer pairs described in materials and methods, PCR products separated by agarose gel electrophoresis and DNA stained with EtBr. The results show the absence of the unmodified locus and its precise replacement with vectors sequences in the selected mutants.  $\lambda$ Pst: *PstI* digested phage Lambda DNA size standard.

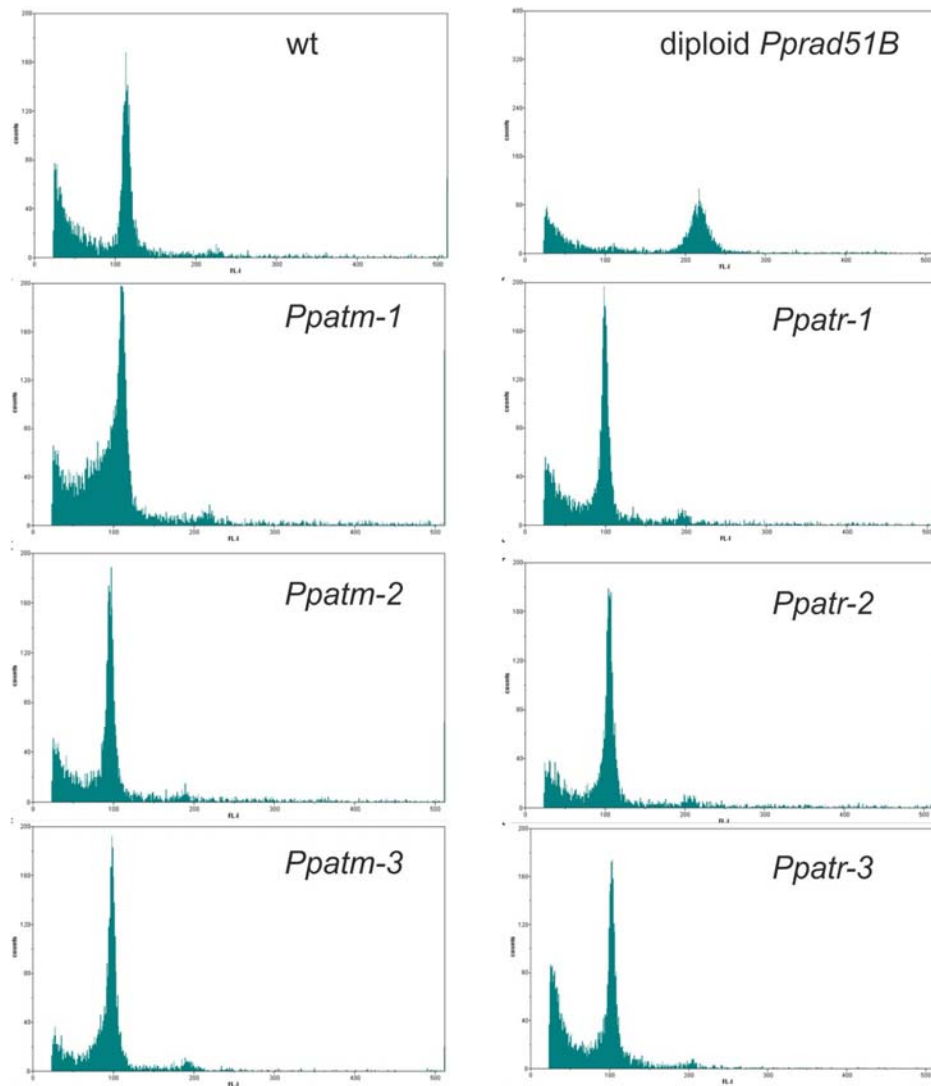

**Figure S2: Flow cytometric analysis of selected mutants.** Crude nuclear extracts were prepared from 7 day old protonema filaments, nuclei stained with DAPI and sorted by DNA content using flow cytometry as described by the manufacturer (Partek). The *Ppatm-1*, *Ppatm-2*, *Ppatm-3* and *Ppatr-1*, *Ppatr-2*, *Ppatr-3* flow histograms are identical to wild type while a diploid *Pprad51B* mutant (Markmann-Mulisch et.al. 2007) displays a significantly different profile that lacks the 1C peak entirely. These results confirm that the analysed mutants are haploid.

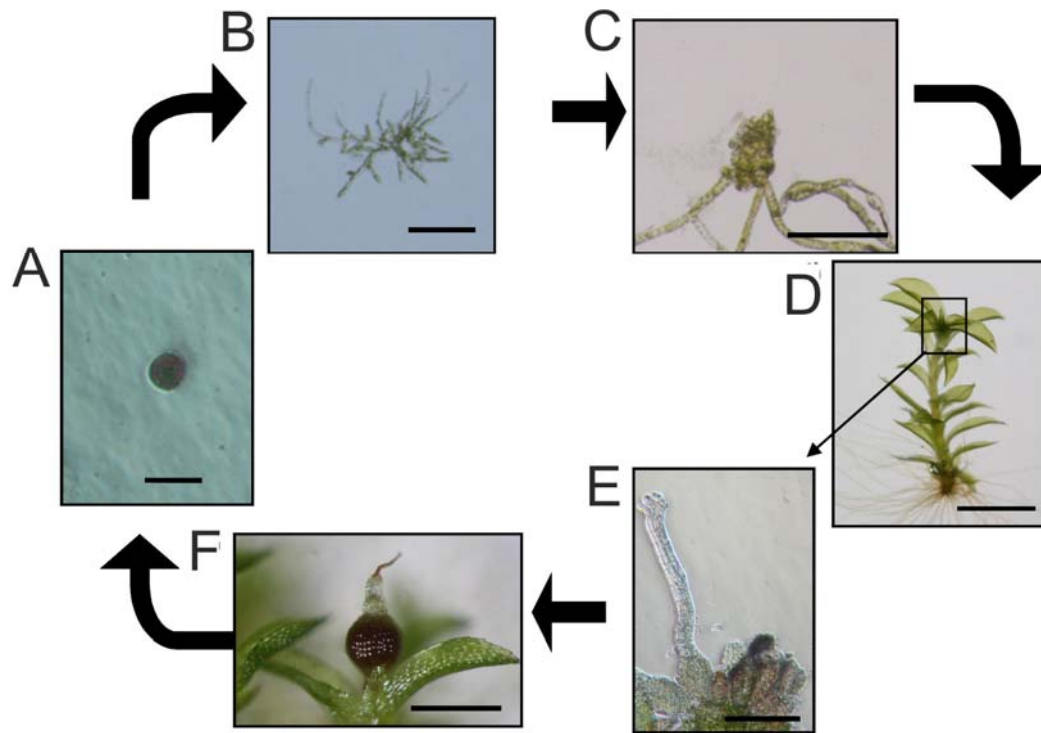

**Figure S3: The *P. patens* life cycle.** (A) Spore. (B) Protonema filaments consisting of slow growing, chloroplast-rich chloronemata and fast growing chloroplast-poor caulonemata. (C) Buds beginning to develop on caulonema. (D) Mature gametophore with developing (E) Male (antheridium) and female (archegonium) reproductive organs. (F) Mature spore capsule. Scale bars indicate, 10 μm (a), 500 μm (b), 200 μm (c), 1 mm (d), 50 μm (e), 500 μm.

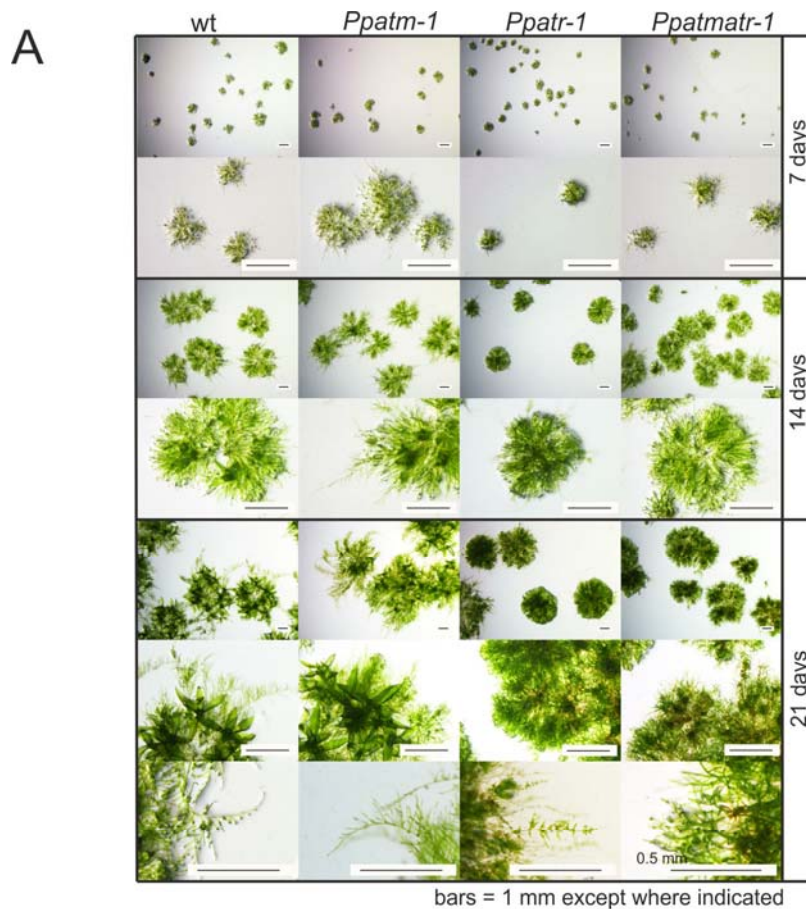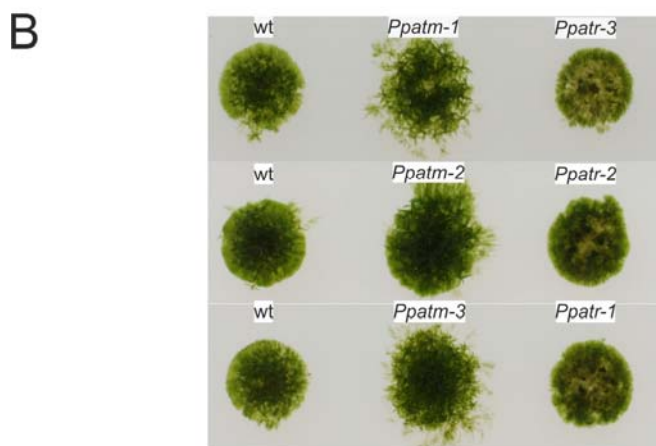

**Figure S4: Supplemental growth analyses** (A) Early colony growth and protonema phenotypes. Size-selected filament fragments containing 1 to 3 living cells were plated on standard media, cultured under standard conditions and growth monitored. The pictures show colonies after 7, 14 and 21 days. The top rows show overviews and the rows below individual colonies at higher magnification to show details of protonema filament morphology. (B) Independently generated *Ppatm-1*, *Ppatm-2*, *Ppatm-3* and *Ppatr-1*, *Ppatr-2*, *Ppatr-3* mutants display identical phenotypes. The picture shows colonies obtained from micro-colonies on standard medium by culturing under standard conditions for 28 days. The characteristics of the *Ppatm-1* and *Ppatr-1* phenotypes are identical with their independently generated sisters.

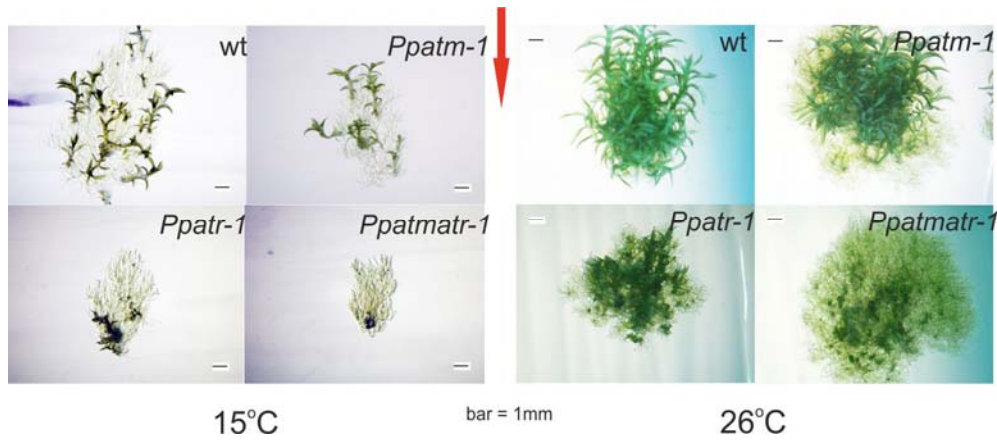

**Figure S5: Environmental conditions shape the *Ppatm-1*, *Ppatr-1* and *Ppatmatr-1* phenotypes.** Micro-colonies were cultivated on standard media with cellophane overlay in unilateral red light at 15<sup>0</sup>C in a 8/16 hour day night cycle or 26<sup>0</sup>C in constant light. The pictures show representative colonies after 10 and 5 weeks of growth, respectively. The direction of the red light is indicated by a red arrow.

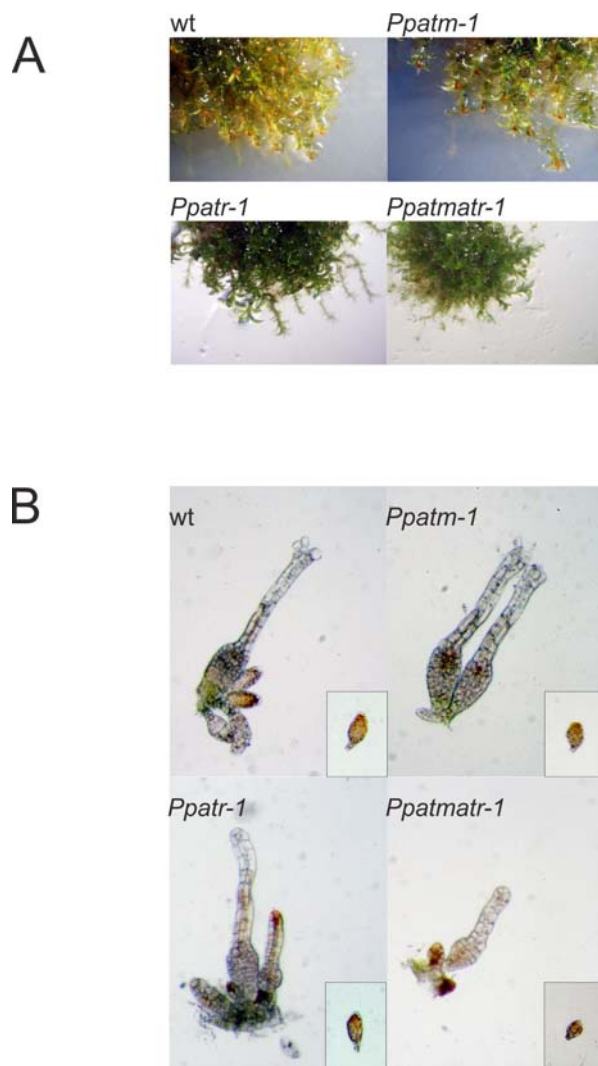

**Figure S6: The mature gametophyte and reproductive structures:** (A) Colonies were grown on minimal media at 15<sup>0</sup> C in an 8/16 hour day night cycle. The picture shows close-ups of wild type, *Ppatm-1*, *Ppatr-1* and *Ppatmatr-1* colonies at an age of four months. In wild type and *Ppatm-1*, almost all gametophores carry mature spore capsules at their tips while those are not present on *Ppatr-1* and *Ppatmatr-1* gametophores. (B) The pictures show the gametangia (reproductive structures) formed in wild type, *Ppatm-1*, *Ppatr-1* and *Ppatmatr-1*. Archegonia, the female organs are shown in the centre and the antheridia in the inset. Gametangia develop normally in *Ppatm-1*. Archegonia are abnormal in *Ppatr-1* or have degenerated shortly after fertilisation while antheridia appear normal. In *Ppatmatr-1*, both structures appear abnormal.



## Supplemental tables:

Table S1

|                                      | Gene                      | human | yeast | <i>A. thaliana</i> | <i>P. patens</i>                   |
|--------------------------------------|---------------------------|-------|-------|--------------------|------------------------------------|
| checkpoint, regulators and signaling |                           |       |       |                    |                                    |
| 1                                    | ATM/Tel1                  | +     | +     | +                  | Pp1s135_65V6.1                     |
| 2                                    | ATR/Mec1                  | +     | +     | +                  | Pp1s77_262V6.1                     |
| 3                                    | ATRIP                     | +     |       | +                  | Pp1s60_281V6.1                     |
| 4                                    | ATRX                      | +     |       | +                  | Pp1s34_370V6.1                     |
| 5                                    | BARD1                     | +     |       | +                  |                                    |
| 6                                    | BRCA1                     | +     |       | +                  |                                    |
| 7                                    | BRCA2/FANCD1              | +     |       | +                  |                                    |
| 8                                    | BRCC36                    | +     |       | +                  | Pp1s54_11V6.2                      |
| 9                                    | CHK1                      | +     | +     |                    |                                    |
| 10                                   | CHK2/Rad53                | +     | +     |                    |                                    |
| 11                                   | DDC1                      |       | +     |                    |                                    |
| 12                                   | DUN1                      |       | +     |                    |                                    |
| 13                                   | hRAD1 /REC1               | +     |       | +                  | Pp1s67_171V6.1                     |
| 14                                   | HUG1                      | +     | +     |                    |                                    |
| 15                                   | Hus1                      | +     | +     | +                  | Pp1s59_63V6.1                      |
| 16                                   | LCD1                      |       | +     |                    |                                    |
| 17                                   | MAPK family               | +     | +     | +                  | Pp1s207_63V6.1,<br>Pp1s138_117V6.1 |
| 18                                   | MDC1                      | +     |       |                    |                                    |
| 19                                   | MEC3                      |       | +     |                    |                                    |
| 20                                   | P53                       | +     |       |                    |                                    |
| 21                                   | PARP1                     | +     |       | +                  | Pp1s114_181V6.1                    |
| 22                                   | PARP2                     | +     |       | +                  | Pp1s324_39V6.1                     |
| 23                                   | PARP3                     | +     |       | +                  | Pp1s59_305V6.1                     |
| 24                                   | PMYT1                     | +     |       |                    | Pp1s207_100V6.1                    |
| 25                                   | RAD17                     | +     | +     | +                  | Pp1s184_70V6.1                     |
| 26                                   | RAD24                     |       | +     |                    |                                    |
| 27                                   | RAD9A/Sprad9              | +     |       | +                  | Pp1s130_202V6.1,<br>Pp1s124_86V6.2 |
| 28                                   | Rad9                      |       | +     |                    |                                    |
| 29                                   | SOG1                      |       |       | +                  | Pp1s251_11V6.1                     |
| 30                                   | TP53B                     | +     |       |                    |                                    |
| 31                                   | WEE1                      | +     | +     | +                  | Pp1s197_56V6.1                     |
| homologous recombination and meiosis |                           |       |       |                    |                                    |
| 32                                   | BLM/RECQ2/<br>RECQL3/SGS1 | +     | +     | +                  | Pp1s243_58V6.1                     |
| 33                                   | CTIP/RBBP8/COM1           | +     | +     | +                  | Pp1s242_87V6.1                     |
| 34                                   | DMC1                      | +     | +     | +                  | Pp1s9_248V6.1                      |
| 35                                   | GEN1/YEN1                 | +     | +     | +                  | Pp1s391_28V6.1                     |
| 36                                   | HOP1                      |       | +     |                    |                                    |
| 37                                   | HOP2                      | +     | +     | +                  | Pp1s335_13V6.1                     |

|    |                             |   |   |   |                                                                        |
|----|-----------------------------|---|---|---|------------------------------------------------------------------------|
| 38 | INO80                       | + | + | + | Pp1s304_7V6.1,<br>Pp1s45_2V6.1                                         |
| 39 | MND1                        | + | + | + | Pp1s41_172V6.1                                                         |
| 40 | MRE11                       | + | + | + | Pp1s18_235V6.1                                                         |
| 41 | MUS81                       | + | + | + | Pp1s15_297V6.1                                                         |
| 42 | NBN/NBS/nimbrin             | + |   | + | Pp1s219_52V6.1                                                         |
| 43 | PAXIP1                      | + |   | + | Pp1s97_25V6.1,<br>Pp1s160_107V6.1,<br>Pp1s35_92V6.1,<br>Pp1s232_74V6.1 |
| 44 | R51A1/RAD51AP1              | + |   |   |                                                                        |
| 45 | RA51B/RAD51B                | + |   | + | Pp1s129_197V6.1                                                        |
| 46 | RA51C/RAD51C                | + | + | + | Pp1s236_47V6.1                                                         |
| 47 | RA51D/RAD51D                | + |   | + | Pp1s137_214V6.1                                                        |
| 48 | RA54B/RAD54B                | + |   |   | Pp1s212_41V6.1                                                         |
| 49 | RAD5                        | + | + | + | Pp1s73_179V6.1,<br>Pp1s41_174V6.1,<br>Pp1s14_367V6.1                   |
| 50 | RAD50                       | + | + | + | Pp1s51_220V6.1                                                         |
| 51 | RAD51/ PpRAD51A<br>PpRAD51B | + | + | + | Pp1s31_236V6.1,<br>Pp1s42_140V6.1                                      |
| 52 | RAD52                       | + | + |   |                                                                        |
| 53 | RAD54                       | + | + | + | Pp1s341_67V6.1,<br>Pp1s236_78V6.1,<br>Pp1s212_41V6.1                   |
| 54 | RAD55                       |   | + |   |                                                                        |
| 55 | RAD59                       |   | + |   |                                                                        |
| 56 | RDH54/TID1                  |   | + |   |                                                                        |
| 57 | REC102                      |   | + |   |                                                                        |
| 58 | REC104                      |   | + |   |                                                                        |
| 59 | REC8                        | + | + | + | Pp1s351_7V6.1                                                          |
| 60 | RecQ1                       | + |   | + | Wiedemann et al 2018                                                   |
| 61 | RecQ4                       | + |   | + | Wiedemann et al 2018                                                   |
| 62 | RECQ5                       | + |   | + | Wiedemann et al 2018                                                   |
| 63 | RED1                        |   | + |   |                                                                        |
| 64 | RMI1                        | + | + | + | Pp1s201_114V6.1                                                        |
| 65 | RMI2                        | + |   | + | Pp1s159_85V6.1                                                         |
| 66 | RQSIM/AtRecQsim             |   |   | + | Pp1s222_3V6.1,<br>Pp1s152_88V6.1                                       |
| 67 | RTEL1                       | + |   | + | Pp1s3_567V6.1                                                          |
| 68 | SGO1/Shugoshin 1            |   | + |   |                                                                        |
| 69 | SPO11                       | + | + | + | Pp1s62_130V6.2,<br>Pp1s14_84V6.1,<br>Pp1s248_24V6.1                    |
| 70 | SRS2                        |   | + | + | Pp1s21_400V6.1                                                         |
| 71 | SYCP1                       | + |   | + |                                                                        |
| 72 | SYCP2                       | + |   | + |                                                                        |
| 73 | SYCP3                       | + |   |   |                                                                        |
| 74 | TOP3A                       | + | + | + | Pp1s475_4V6.1                                                          |
| 75 | TOP3B                       | + |   | + | Pp1s474_3V6.1                                                          |

|                                        |                   |   |   |   |                                                                        |
|----------------------------------------|-------------------|---|---|---|------------------------------------------------------------------------|
| 76                                     | WRIP1             | + | + | + | Pp1s16_272V6.1,<br>Pp1s455_6V6.1,<br>Pp1s97_156V6.1                    |
| 77                                     | WRN               | + |   |   | Pp1s128_34V6.1                                                         |
| 78                                     | WRX (TAIR)        |   |   | + | Pp1s246_95V6.1,<br>Pp1s135_47V6.1,<br>Pp1s4_355V6.1                    |
| 79                                     | XRCC2             | + |   | + | Pp1s45_271V6.1                                                         |
| 80                                     | XRCC3             | + |   | + |                                                                        |
| 81                                     | XRS2              |   | + |   |                                                                        |
| 82                                     | ZIP1              |   | + |   |                                                                        |
| general functions and crosslink repair |                   |   |   |   |                                                                        |
| 83                                     | DCR1A/PSO2/SNM1   | + | + | + | Pp1s377_22V6.1,<br>Pp1s120_12V6.1                                      |
| 84                                     | DCR1B             | + |   | + | Pp1s68_3V6.1,<br>Pp1s68_4V6.1                                          |
| 85                                     | DDX11             | + |   |   | Pp1s370_33V6.1                                                         |
| 86                                     | DNLI1             | + | + | + | Pp1s223_54V6.2                                                         |
| 87                                     | DNLI3             | + |   |   |                                                                        |
| 88                                     | DNLI4             | + | + | + | Pp1s150_94V6.1,<br>Pp1s150_94V6.2                                      |
| 89                                     | FANCA             | + |   |   |                                                                        |
| 90                                     | FANCB             | + |   |   |                                                                        |
| 91                                     | FANCC             | + |   |   |                                                                        |
| 92                                     | FANCD2            | + |   | + | Pp1s204_101V6.1                                                        |
| 93                                     | FANCE             | + |   |   |                                                                        |
| 94                                     | FANCF             | + |   |   |                                                                        |
| 95                                     | FANCG             | + |   |   |                                                                        |
| 96                                     | FANCI/BRIP1/BACH1 | + |   | + | Pp1s95_66V6.1                                                          |
| 97                                     | FANCL             | + |   | + | Pp1s156_74V6.1                                                         |
| 98                                     | FANCM             | + | + | + | Pp1s9_477V6.1                                                          |
| 99                                     | LIF1              |   | + |   |                                                                        |
| 100                                    | PIF1              | + | + | + | Pp1s152_136V6.1,<br>Pp1s300_57V6.1                                     |
| 101                                    | PNKP              | + |   | + | Pp1s240_31V6.1                                                         |
| 102                                    | RAD21             | + | + | + | Pp1s77_167V6.2,<br>Pp1s77_195V6.2,<br>Pp1s351_7V6.1                    |
| 103                                    | RNF4              | + |   | + | Pp1s491_21V6.1,<br>Pp1s121_28V6.2,<br>Pp1s3_270V6.1,<br>Pp1s369_26V6.1 |
| 104                                    | RUVBL1            | + | + | + | Pp1s4_73V6.1,<br>Pp1s40_80V6.1,<br>Pp1s40_79V6.1                       |
| 105                                    | RUVBL2            | + | + | + | Pp1s255_64V6.1,<br>Pp1s402_30V6.1,<br>Pp1s88_18V6.1                    |
| 106                                    | SCC2              | + | + | + | Pp1s104_102V6.1                                                        |
| 107                                    | SM1L2/SMC1B       | + |   |   |                                                                        |
| 108                                    | SMC1A             | + | + | + | Pp1s91_43V6.1                                                          |
| 109                                    | SMC2              | + | + | + | Pp1s52_57V6.1                                                          |

|                                                         |                         |   |   |   |                                                                         |
|---------------------------------------------------------|-------------------------|---|---|---|-------------------------------------------------------------------------|
| 110                                                     | SMC3                    | + | + | + | Pp1s410_17V6.1                                                          |
| 111                                                     | SMC5                    | + | + | + | Pp1s274_85V6.1                                                          |
| 112                                                     | SMC6                    | + | + | + | Pp1s61_278V6.1                                                          |
| 113                                                     | STAG1                   | + | + | + | Pp1s199_157V6.1                                                         |
| 114                                                     | STAG2                   | + |   |   |                                                                         |
| 115                                                     | STAG3                   | + |   |   |                                                                         |
| 116                                                     | TOF1                    |   | + |   |                                                                         |
| 117                                                     | TOPB1                   | + |   | + | Pp1s1_250V6.1                                                           |
| <b>non-homologous end-joining</b>                       |                         |   |   |   |                                                                         |
| 118                                                     | DCR1C/ARTEMIS           | + |   |   |                                                                         |
| 119                                                     | KU70/XRCC6              | + | + | + | Pp1s299_4V6.1                                                           |
| 120                                                     | KU80/XRCC5              | + | + | + | Pp1s121_27V6.1                                                          |
| 121                                                     | NHEJ1/XLF/<br>CERNUNNOS | + |   |   |                                                                         |
| 122                                                     | PRKDC/DNA-PKcs          | + |   |   | Pp1s78_226V6.1                                                          |
| 123                                                     | XRCC1                   | + |   | + | Pp1s224_52V6.1,<br>Pp1s85_35V6.1                                        |
| 124                                                     | XRCC4                   | + |   | + | Pp1s34_261V6.1,<br>Pp1s147_88V6.1                                       |
| <b>mismatch repair</b>                                  |                         |   |   |   |                                                                         |
| 125                                                     | DIN7                    |   | + |   |                                                                         |
| 126                                                     | EME1                    | + |   | + | Pp1s72_302V6.1                                                          |
| 127                                                     | EXO1                    | + | + | + | Pp1s10_231V6.2,<br>Pp1s212_68V6.2                                       |
| 128                                                     | MLH1                    | + | + | + | Pp1s58_199V6.1                                                          |
| 129                                                     | MLH2                    |   | + |   |                                                                         |
| 130                                                     | MLH3                    | + | + | + | Pp1s5_400V6.1                                                           |
| 131                                                     | MSH1                    |   | + |   |                                                                         |
| 132                                                     | MSH2                    | + | + | + | Pp1s251_77V6.1                                                          |
| 133                                                     | MSH3                    | + | + | + | Pp1s30_339V6.1                                                          |
| 134                                                     | MSH4                    | + | + | + | Pp1s226_85V6.1                                                          |
| 135                                                     | MSH5                    | + | + | + | Pp1s84_88V6.2                                                           |
| 136                                                     | MSH6                    | + | + | + | Pp1s152_6V6.1,<br>Pp1s90_86V6.1                                         |
| 137                                                     | Muts                    |   | + |   | Pp1s3_417V6.1                                                           |
| 138                                                     | MUTYH                   | + |   | + | Pp1s151_27V6.1                                                          |
| 139                                                     | PMS1/PMS2               | + | + | + | Pp1s474_7V6.1                                                           |
| <b>nucleotide excision, base excision and UV repair</b> |                         |   |   |   |                                                                         |
| 140                                                     | DDB1                    | + |   | + | Pp1s458_4V6.1,<br>Pp1s203_55V6.1                                        |
| 141                                                     | DDB2                    | + |   | + | Pp1s114_132V6.1                                                         |
| 142                                                     | ERCC1/Rad10             | + | + | + | Pp1s117_170V6.1,<br>Pp1s117_181V6.1                                     |
| 143                                                     | ERCC2/XPD               | + | + | + | Pp1s145_26V6.3                                                          |
| 144                                                     | ERCC3/Rad25/XPB         | + | + | + | Pp1s177_124V6.1                                                         |
| 145                                                     | ERCC5/RAD2              | + | + | + | Pp1s31_24V6.1                                                           |
| 146                                                     | ERCC6/rad26             | + | + | + | Pp1s66_144V6.1,<br>Pp1s34_212V6.1,<br>Pp1s84_259V6.1,<br>Pp1s155_61V6.3 |
| 147                                                     | RAD16                   |   | + | + | Pp1s3_639V6.1,<br>Pp1s132_19V6.1                                        |

|                                |                |   |   |   |                                                                       |
|--------------------------------|----------------|---|---|---|-----------------------------------------------------------------------|
| 148                            | RAD18          | + | + |   |                                                                       |
| 149                            | RAD23          | + | + | + | Pp1s58_148V6.1,<br>Pp1s286_52V6.1,<br>Pp1s3_105V6.1,<br>Pp1s3_98V6.1  |
| 150                            | RAD27/FEN1     | + | + | + | Pp1s456_8V6.1,<br>Pp1s39_160V6.2                                      |
| 151                            | RAD6/UBC2      | + | + | + | Pp1s91_88V6.1,<br>Pp1s91_87V6.1,<br>Pp1s219_106V6.1                   |
| 152                            | RAD7           |   | + | + |                                                                       |
| 153                            | SYF1           | + | + | + | Pp1s139_28V6.1                                                        |
| 154                            | XPA/RAD14      | + | + |   |                                                                       |
| 155                            | XPC/RAD4       | + | + | + | Pp1s12_235V6.1                                                        |
| 156                            | XPF/ERCC4/RAD1 | + | + | + | Pp1s3_646V6.1                                                         |
| <b>ATM and ATR interactors</b> |                |   |   |   |                                                                       |
| 157                            | 4EBP1/4E-BP1   | + |   |   |                                                                       |
| 158                            | AATF (Che1)    | + |   | + | Pp1s186_46V6.1                                                        |
| 159                            | ABL1           | + |   |   |                                                                       |
| 160                            | AKT1/PKB       | + |   |   |                                                                       |
| 161                            | BID            | + |   |   |                                                                       |
| 162                            | Cdc5l          | + | + | + | Pp1s641_1V6.1                                                         |
| 163                            | CHD family     | + |   | + | Pp1s33_329V6.1,<br>Pp1s235_76V6.1                                     |
| 164                            | CLSPN/Claspin  | + |   |   |                                                                       |
| 165                            | CREB1          | + |   |   |                                                                       |
| 166                            | E2F            | + |   | + | Pp1s22_60V6.1,<br>Pp1s38_356V6.1,<br>Pp1s364_42V6.1,<br>Pp1s97_96V6.1 |
| 167                            | H2A            | + |   | + | Pp1s55_112V6.1,<br>Pp1s452_4V6.1,<br>Pp1s188_35V6.1                   |
| 168                            | HDAC1          | + | + | + | Pp1s223_52V6.1,<br>Pp1s351_29V6.1,<br>Pp1s180_68V6.1                  |
| 169                            | HDAC2          | + |   | + |                                                                       |
| 170                            | IKBA           | + |   |   |                                                                       |
| 171                            | MCA3 (p18)     | + |   |   |                                                                       |
| 172                            | MCM2           | + | + | + | Pp1s28_266V6.1                                                        |
| 173                            | MCM3           | + | + | + | Pp1s9_156V6.1                                                         |
| 174                            | MCM7           | + | + | + | Pp1s31_86V6.1                                                         |
| 175                            | MDM2           | + |   |   |                                                                       |
| 176                            | MDM4           | + |   |   |                                                                       |
| 177                            | PTPA           | + | + | + | Pp1s111_153V6.1,<br>Pp1s226_56V6.1                                    |
| 178                            | RENT1 (UPF1)   | + | + | + | Pp1s10_103V6.1,<br>Pp1s44_135V6.1                                     |
| 179                            | RFA1 (RPA)     | + | + | + | Pp1s222_133V6.1,<br>Pp1s192_40V6.1,<br>Pp1s257_1V6.1                  |

|     |             |   |   |   |                                                                                                                                                     |
|-----|-------------|---|---|---|-----------------------------------------------------------------------------------------------------------------------------------------------------|
| 180 | RFA2 (RPA)  | + | + | + | Pp1s357_53V6.1                                                                                                                                      |
| 181 | SOSB1/hSSB1 | + |   | + | Pp1s112_133V6.1                                                                                                                                     |
| 182 | SP1/TSFP1   | + |   |   |                                                                                                                                                     |
| 183 | STRAP       | + |   | + | Pp1s217_52V6.1,<br>Pp1s25_22V6.1,<br>Pp1s1020_4V6.1                                                                                                 |
| 184 | TERF family | + |   | + | Pp1s74_197V6.1,<br>Pp1s114_137V6.1,<br>Pp1s176_113V6.1,<br>Pp1s1_349V6.1,<br>Pp1s176_88V6.1,<br>Pp1s260_3V6.1,<br>Pp1s49_258V6.1,<br>Pp1s152_10V6.1 |
| 185 | TIF1B       | + |   |   |                                                                                                                                                     |
| 186 | TRIM1       | + |   |   |                                                                                                                                                     |

**Table S1: Conservation of DNA damage repair-related genes between human, yeast and *A. thaliana* and the corresponding gene set in *P. patens*.** The table lists genes from known sets in human and yeast and the occurrence of corresponding orthologues in human, yeast, *A. thaliana* and *P. patens* as obtained by BLAST analyses with corresponding protein sequences. The presence in human, yeast and *A. thaliana* is indicated by “+”, for *P. patens* the corresponding gene models are listed. Gene names are in UniProt nomenclature throughout and listed in the order human/synonym/yeast/fission yeast/*A. thaliana*. Additional synonyms are occasionally included. A conversion table of the v1.6 to the v3.3 *P. patens* genome annotation is available at <http://plantco.de/research.php>.

Table S2

| <i>P. patens</i><br>gene model         | Gene<br>(UniProt<br>nomenclature) | Bleo 0.3<br>1h / Bleo<br>0 1h | Bleo 3.0<br>1h / Bleo<br>0 1h | Bleo 0.3<br>1h - Bleo<br>0 3h /<br>Bleo 0 1h |
|----------------------------------------|-----------------------------------|-------------------------------|-------------------------------|----------------------------------------------|
| checkpoints, regulators and signalling |                                   |                               |                               |                                              |
| Pp1s135_65V6.1                         | ATM                               | 1.64                          | 1.28                          | 1.54                                         |
| Pp1s60_281V6.1                         | ATRIP                             | 0.64                          | 0.51                          | 0.65                                         |
| Pp1s34_370V6.1                         | ATRX                              | 9.76                          | 4.91                          | 7.49                                         |
| Pp1s67_171V6.1                         | hRAD1 /REC1                       | 1.48                          | 1.98                          | 4.55                                         |
| Pp1s59_63V6.1                          | Hus1                              | 7.10                          | 5.95                          | 10.68                                        |
| Pp1s184_70V6.1                         | RAD17                             | 2.37                          | 3.21                          | 8.43                                         |
| Pp1s130_202V6.1                        | RAD9A/Sprad9 (1)                  | 6.39                          | 9.41                          | 44.85                                        |
| Pp1s251_11V6.1                         | ANAC008/SOG1                      | 0.84                          | 0.61                          | 1.27                                         |
| Pp1s207_63V6.1                         | MAPK family (1)                   | 0.49                          | 0.63                          | 0.12                                         |
| Pp1s138_117V6.1                        | MAPK family (2)                   | 0.47                          | 0.45                          | 0.18                                         |
| Pp1s207_100V6.1                        | PMYT1                             | 0.97                          | 0.84                          | 1.21                                         |
| Pp1s197_56V6.1                         | WEE1                              | 2.22                          | 1.70                          | 6.18                                         |
| Pp1s324_39V6.1                         | PARP2                             | 2.98                          | 4.59                          | 4.97                                         |
| homologous recombination and meiosis   |                                   |                               |                               |                                              |
| Pp1s93_66V6.1                          | RecQ1/RQL2 Arath                  | 0.44                          | 0.65                          | 1.04                                         |
| Pp1s152_88V6.1                         | RQSIM                             | 0.73                          | 0.59                          | 1.86                                         |
| Pp1s201_114V6.1                        | RMI1                              | 0.59                          | 0.87                          | 0.98                                         |
| Pp1s159_85V6.1                         | RMI2                              | 1.06                          | 0.80                          | 0.76                                         |
| Pp1s15_297V6.1                         | MUS81                             | 0.38                          | 0.52                          | 0.37                                         |
| Pp1s219_52V6.1                         | NBN                               | 0.97                          | 0.91                          | 1.61                                         |
| Pp1s236_47V6.1                         | RA51C                             | 1.04                          | 1.70                          | 2.25                                         |
| Pp1s212_41V6.1                         | RA54B                             | 1.90                          | 3.40                          | 8.67                                         |
| Pp1s42_140V6.1                         | PpRAD51B                          | 0.89                          | 4.08                          | 3.37                                         |
| Pp1s31_236V6.1                         | PpRAD51A                          | 3.53                          | 7.20                          | 10.48                                        |
| Pp1s341_67V6.1                         | RAD54 (1)                         | 2.80                          | 2.81                          | 7.33                                         |
| Pp1s236_78V6.1                         | RAD54 (2)                         | 2.66                          | 3.68                          | 3.09                                         |
| Pp1s255_64V6.1                         | RUVB2                             | 2.92                          | 1.78                          | 2.25                                         |
| Pp1s16_272V6.1                         | WRIP1 (1)                         | 1.10                          | 1.04                          | 3.46                                         |
| Pp1s455_6V6.1                          | WRIP1 (2)                         | 0.43                          | 0.62                          | 0.43                                         |
| Pp1s135_47V6.1                         | WRX (1)                           | 1.34                          | 0.84                          | 1.35                                         |
| Pp1s4_355V6.1                          | WRX (2)                           | 1.71                          | 0.79                          | 1.65                                         |
| Pp1s45_271V6.1                         | XRCC2                             | 0.55                          | 0.30                          | 0.49                                         |
| Pp1s97_25V6.1                          | PaxIP1 (1)                        | 1.23                          | 1.12                          | 1.46                                         |
| Pp1s160_107V6.1                        | PaxIP1 (2)                        | 0.25                          | 1.78                          | 1.12                                         |
| Pp1s35_92V6.1                          | PaxIP1 (3)                        | 4.90                          | 3.50                          | 1.47                                         |
| Pp1s232_74V6.1                         | PaxIP1 (4)                        | 0.61                          | 0.83                          | 0.50                                         |
| Pp1s335_13V6.1                         | HOP2                              | 0.83                          | 0.96                          | 1.93                                         |

|                                                  |                 |      |       |        |
|--------------------------------------------------|-----------------|------|-------|--------|
| Pp1s41_172V6.1                                   | MND1            | 2.92 | 1.94  | 2.89   |
| Pp1s62_130V6.1                                   | SPO11           | 0.87 | 0.41  | 0.87   |
| general functions and cross link repair          |                 |      |       |        |
| Pp1s370_33V6.1                                   | DDX11           | 0.73 | 0.88  | 0.87   |
| Pp1s223_54V6.2                                   | DNL1            | 1.56 | 2.57  | 5.15   |
| Pp1s240_31V6.1                                   | PNKP            | 3.11 | 4.37  | 11.08  |
| Pp1s91_43V6.1                                    | SMC1A           | 0.74 | 0.76  | 1.12   |
| Pp1s274_85V6.1                                   | SMC5            | 0.83 | 0.90  | 1.57   |
| Pp1s77_195V6.2                                   | RAD21           | 1.18 | 1.42  | 0.19   |
| Pp1s491_21V6.1                                   | RNF4 (1)        | 1.30 | 1.22  | 1.21   |
| Pp1s121_28V6.2                                   | RNF4 (2)        | 1.37 | 1.08  | 0.92   |
| Pp1s3_270V6.1                                    | RNF4 (3)        | 1.37 | 1.25  | 1.67   |
| Pp1s300_57V6.1                                   | PIF1            | 2.13 | 1.81  | 4.72   |
| Pp1s104_102V6.1                                  | SCC2            | 0.84 | 0.57  | 0.56   |
| Pp1s68_122V6.2                                   | SIR2 (1)        | 1.02 | 0.58  | 1.15   |
| Pp1s272_33V6.1                                   | SIR2 (2)        | 0.55 | 0.57  | 0.91   |
| Pp1s15_90V6.2                                    | SIR2 (3)        | 0.82 | 0.57  | 0.65   |
| Pp1s204_101V6.1                                  | FACD2           | 0.47 | 0.07  | 0.86   |
| Pp1s156_74V6.1                                   | FANCL           | 0.77 | 0.69  | 1.05   |
| non-homologous end-joining                       |                 |      |       |        |
| Pp1s299_4V6.1                                    | KU70/xrcc6      | 1.67 | 3.14  | 16.70  |
| Pp1s121_27V6.1                                   | KU80/XRCC5      | 1.28 | 1.79  | 4.38   |
| Pp1s78_226V6.1                                   | PRKDC           | 0.82 | 0.49  | 0.32   |
| Pp1s224_52V6.1                                   | XRCC1           | 2.66 | 3.40  | 3.37   |
| Pp1s147_88V6.1                                   | XRCC4           | 9.32 | 19.27 | 126.46 |
| mismatch repair                                  |                 |      |       |        |
| Pp1s72_302V6.1                                   | EME1            | 0.68 | 0.40  | 0.48   |
| Pp1s58_199V6.1                                   | MLH1            | 0.58 | 0.52  | 1.58   |
| Pp1s5_400V6.1                                    | MLH3            | 1.33 | 0.57  | 2.62   |
| Pp1s3_417V6.1                                    | Muts            | 0.59 | 1.32  | 0.94   |
| Pp1s251_77V6.1                                   | MSH2            | 0.96 | 1.11  | 1.67   |
| Pp1s30_339V6.1                                   | MSH3            | 1.63 | 0.87  | 0.90   |
| Pp1s84_88V6.1                                    | MSH5            | 0.63 | 0.60  | 0.66   |
| Pp1s474_7V6.1                                    | PMS1/PMS2       | 0.63 | 0.92  | 1.45   |
| Pp1s10_231V6.2                                   | EXO1            | 0.89 | 0.58  | 0.98   |
| nucleotide excision, base excision and UV repair |                 |      |       |        |
| Pp1s117_170V6.1                                  | ERCC1/Rad10 (1) | 0.94 | 1.46  | 1.35   |
| Pp1s145_26V6.3                                   | ERCC2/XPD       | 1.05 | 1.73  | 3.24   |
| Pp1s177_124V6.1                                  | ERCC3/Rad25/XPB | 0.85 | 1.37  | 2.33   |
| Pp1s3_646V6.1                                    | XPF/ERCC4/RAD1  | 1.26 | 1.98  | 4.03   |
| Pp1s31_24V6.1                                    | ERCC5/RAD2      | 0.23 | 0.39  | 0.64   |



|                         |                  |      |      |      |
|-------------------------|------------------|------|------|------|
| Pp1s66_144V6.1          | ERCC6/rad26 (1)  | 2.03 | 1.66 | 2.17 |
| Pp1s155_61V6.3          | ERCC6/rad26 (2)  | 0.33 | 0.71 | 0.07 |
| Pp1s139_28V6.1          | SYF1             | 0.62 | 0.60 | 1.02 |
| Pp1s3_639V6.1           | RAD16 (1)        | 1.51 | 1.68 | 1.12 |
| Pp1s132_19V6.1          | RAD16 (2)        | 1.98 | 2.01 | 2.16 |
| Pp1s58_148V6.1          | RAD23 (1)        | 0.81 | 1.01 | 0.57 |
| Pp1s286_52V6.1          | RAD23 (2)        | 1.29 | 1.70 | 1.92 |
| Pp1s3_105V6.1           | RAD23 (3)        | 1.78 | 0.89 | 1.94 |
| Pp1s456_8V6.1           | RAD27/FEN1 (1)   | 0.78 | 0.85 | 0.70 |
| Pp1s39_160V6.1          | RAD27/FEN1 (2)   | 2.66 | 1.51 | 5.25 |
| Pp1s91_87V6.1           | RAD6/UBC2 (1)    | 0.94 | 0.90 | 0.81 |
| Pp1s219_106V6.1         | RAD6/UBC2 (2)    | 1.22 | 1.25 | 1.29 |
| Pp1s458_4V6.1           | DDB1 (1)         | 0.94 | 0.79 | 0.98 |
| Pp1s203_55V6.1          | DDB1 (2)         | 1.68 | 0.48 | 1.36 |
| Pp1s114_132V6.1         | DDB2             | 1.91 | 1.90 | 3.99 |
| ATM and ATR interactors |                  |      |      |      |
| Pp1s33_329V6.1          | CHD family (1)   | 0.61 | 0.54 | 0.53 |
| Pp1s235_76V6.1          | CHD family (2)   | 0.89 | 0.88 | 0.53 |
| Pp1s22_60V6.1           | E2F1             | 0.74 | 0.70 | 2.19 |
| Pp1s55_112V6.1          | H2A(1)           | 1.18 | 0.66 | 0.45 |
| Pp1s452_4V6.1           | H2A (2)          | 2.73 | 0.74 | 1.56 |
| Pp1s223_52V6.1          | HDAC1 (1)        | 0.81 | 0.47 | 0.56 |
| Pp1s351_29V6.1          | HDAC1 (2)        | 0.71 | 0.91 | 0.93 |
| Pp1s180_68V6.1          | HDAC1 (3)        | 1.34 | 1.66 | 0.92 |
| Pp1s31_86V6.1           | MCM7             | 1.69 | 1.36 | 0.67 |
| Pp1s226_56V6.1          | PTPA (1)         | 1.19 | 1.13 | 2.02 |
| Pp1s111_153V6.1         | PTPA (2)         | 1.42 | 3.17 | 2.47 |
| Pp1s10_103V6.1          | RENT1 (UPF1) (1) | 2.04 | 2.95 | 1.80 |
| Pp1s222_133V6.1         | RFA1 (RPA)       | 3.35 | 3.40 | 3.00 |
| Pp1s357_53V6.1          | RFA2 (RPA)       | 1.04 | 1.18 | 1.05 |
| Pp1s112_133V6.1         | SOSB1 (SSB1)     | 0.55 | 0.50 | 0.93 |
| Pp1s217_52V6.1          | STRAP (1)        | 0.42 | 0.07 | 0.33 |
| Pp1s25_22V6.1           | STRAP (2)        | 0.86 | 0.81 | 1.14 |
| Pp1s114_137V6.1         | TERF family (1)  | 1.04 | 0.85 | 0.69 |
| Pp1s176_113V6.2         | TERF family (2)  | 1.53 | 0.97 | 1.22 |
| Pp1s1_349V6.1           | TERF family (3)  | 0.55 | 0.88 | 0.80 |

**Table S2: The early response of DNA damage repair-related genes to bleomycin-induced DNA damage.** The differential expression profiles obtained for the treatment and mock treatment, respectively, of wild type with lethal (3.0 u/l) and sub-lethal (0.3 u/l) concentrations of bleomycin for 1 hour and the following 3 hour recovery period are shown for the set of DNA

damage repair-related genes. The fold-change ratios are: Bleo 0.3 1h / Bleo 0 1h, 1 h 0.3 u/l treatment (T1/0.3) divided by mock treatment for 1 h (T1/0); Bleo 3.0 1h / Bleo 0 1h, 1 h 3.0 u/l treatment (T1/3.0) divided by mock treatment for 1 h (T1/0); Bleo 0.3 1h – Bleo 0 3h /Bleo 0 1h, 1 hour 0.3 u/l treatment followed by 3 h recovery (T4/0.3) divided by mock treatment for 1 h (T1/0). The nomenclature is as in table S1 and table 1.
